# Supplementary material for: Lactobacillus delbrueckii subsp. bulgaricus Alleviates Acute Injury in Hypoxic Mice
Source: MDPI journal article supplement (doi:10.3390/nu16101465), 2024-05-13
Supplement: s1 [file s1]

## Supplementary materials

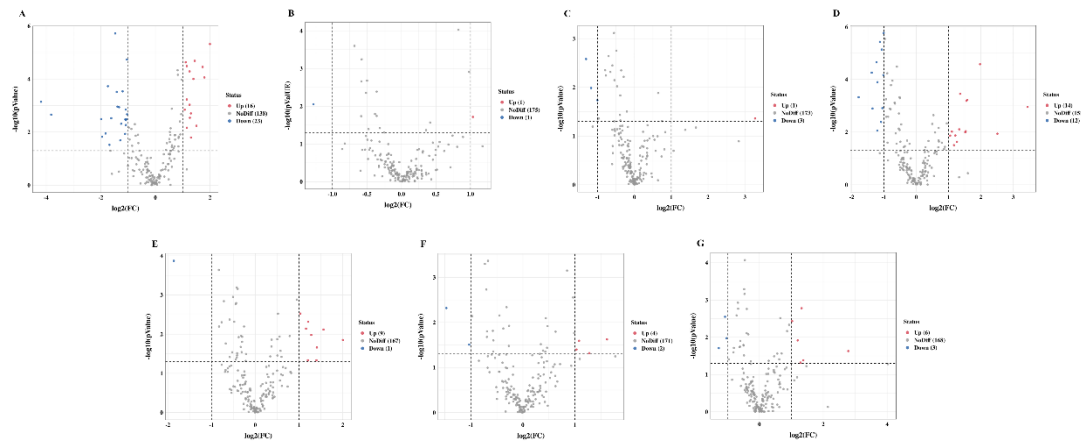

**Figure S1** The effect of *Lactobacillus delbrueckii* subsp. *bulgaricus* on mouse fecal metabolites. (A-G) Differential metabolites between Control, AC, 4L3, 3L9, 2L1, 1L2, 5L6, and HH groups,

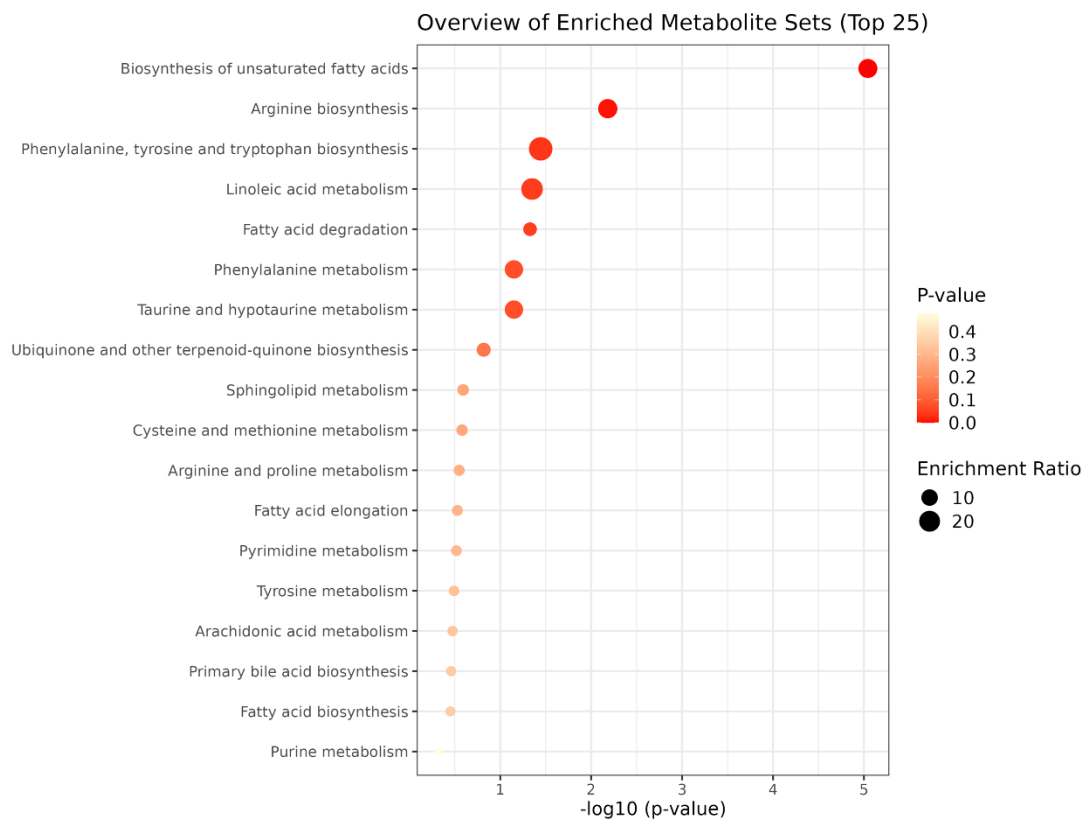

**Figure S2** KEGG pathway enrichment analysis of differential metabolites.
